# Supplementary material
Source: PubMed Central journal article supplement (PMC5702735)

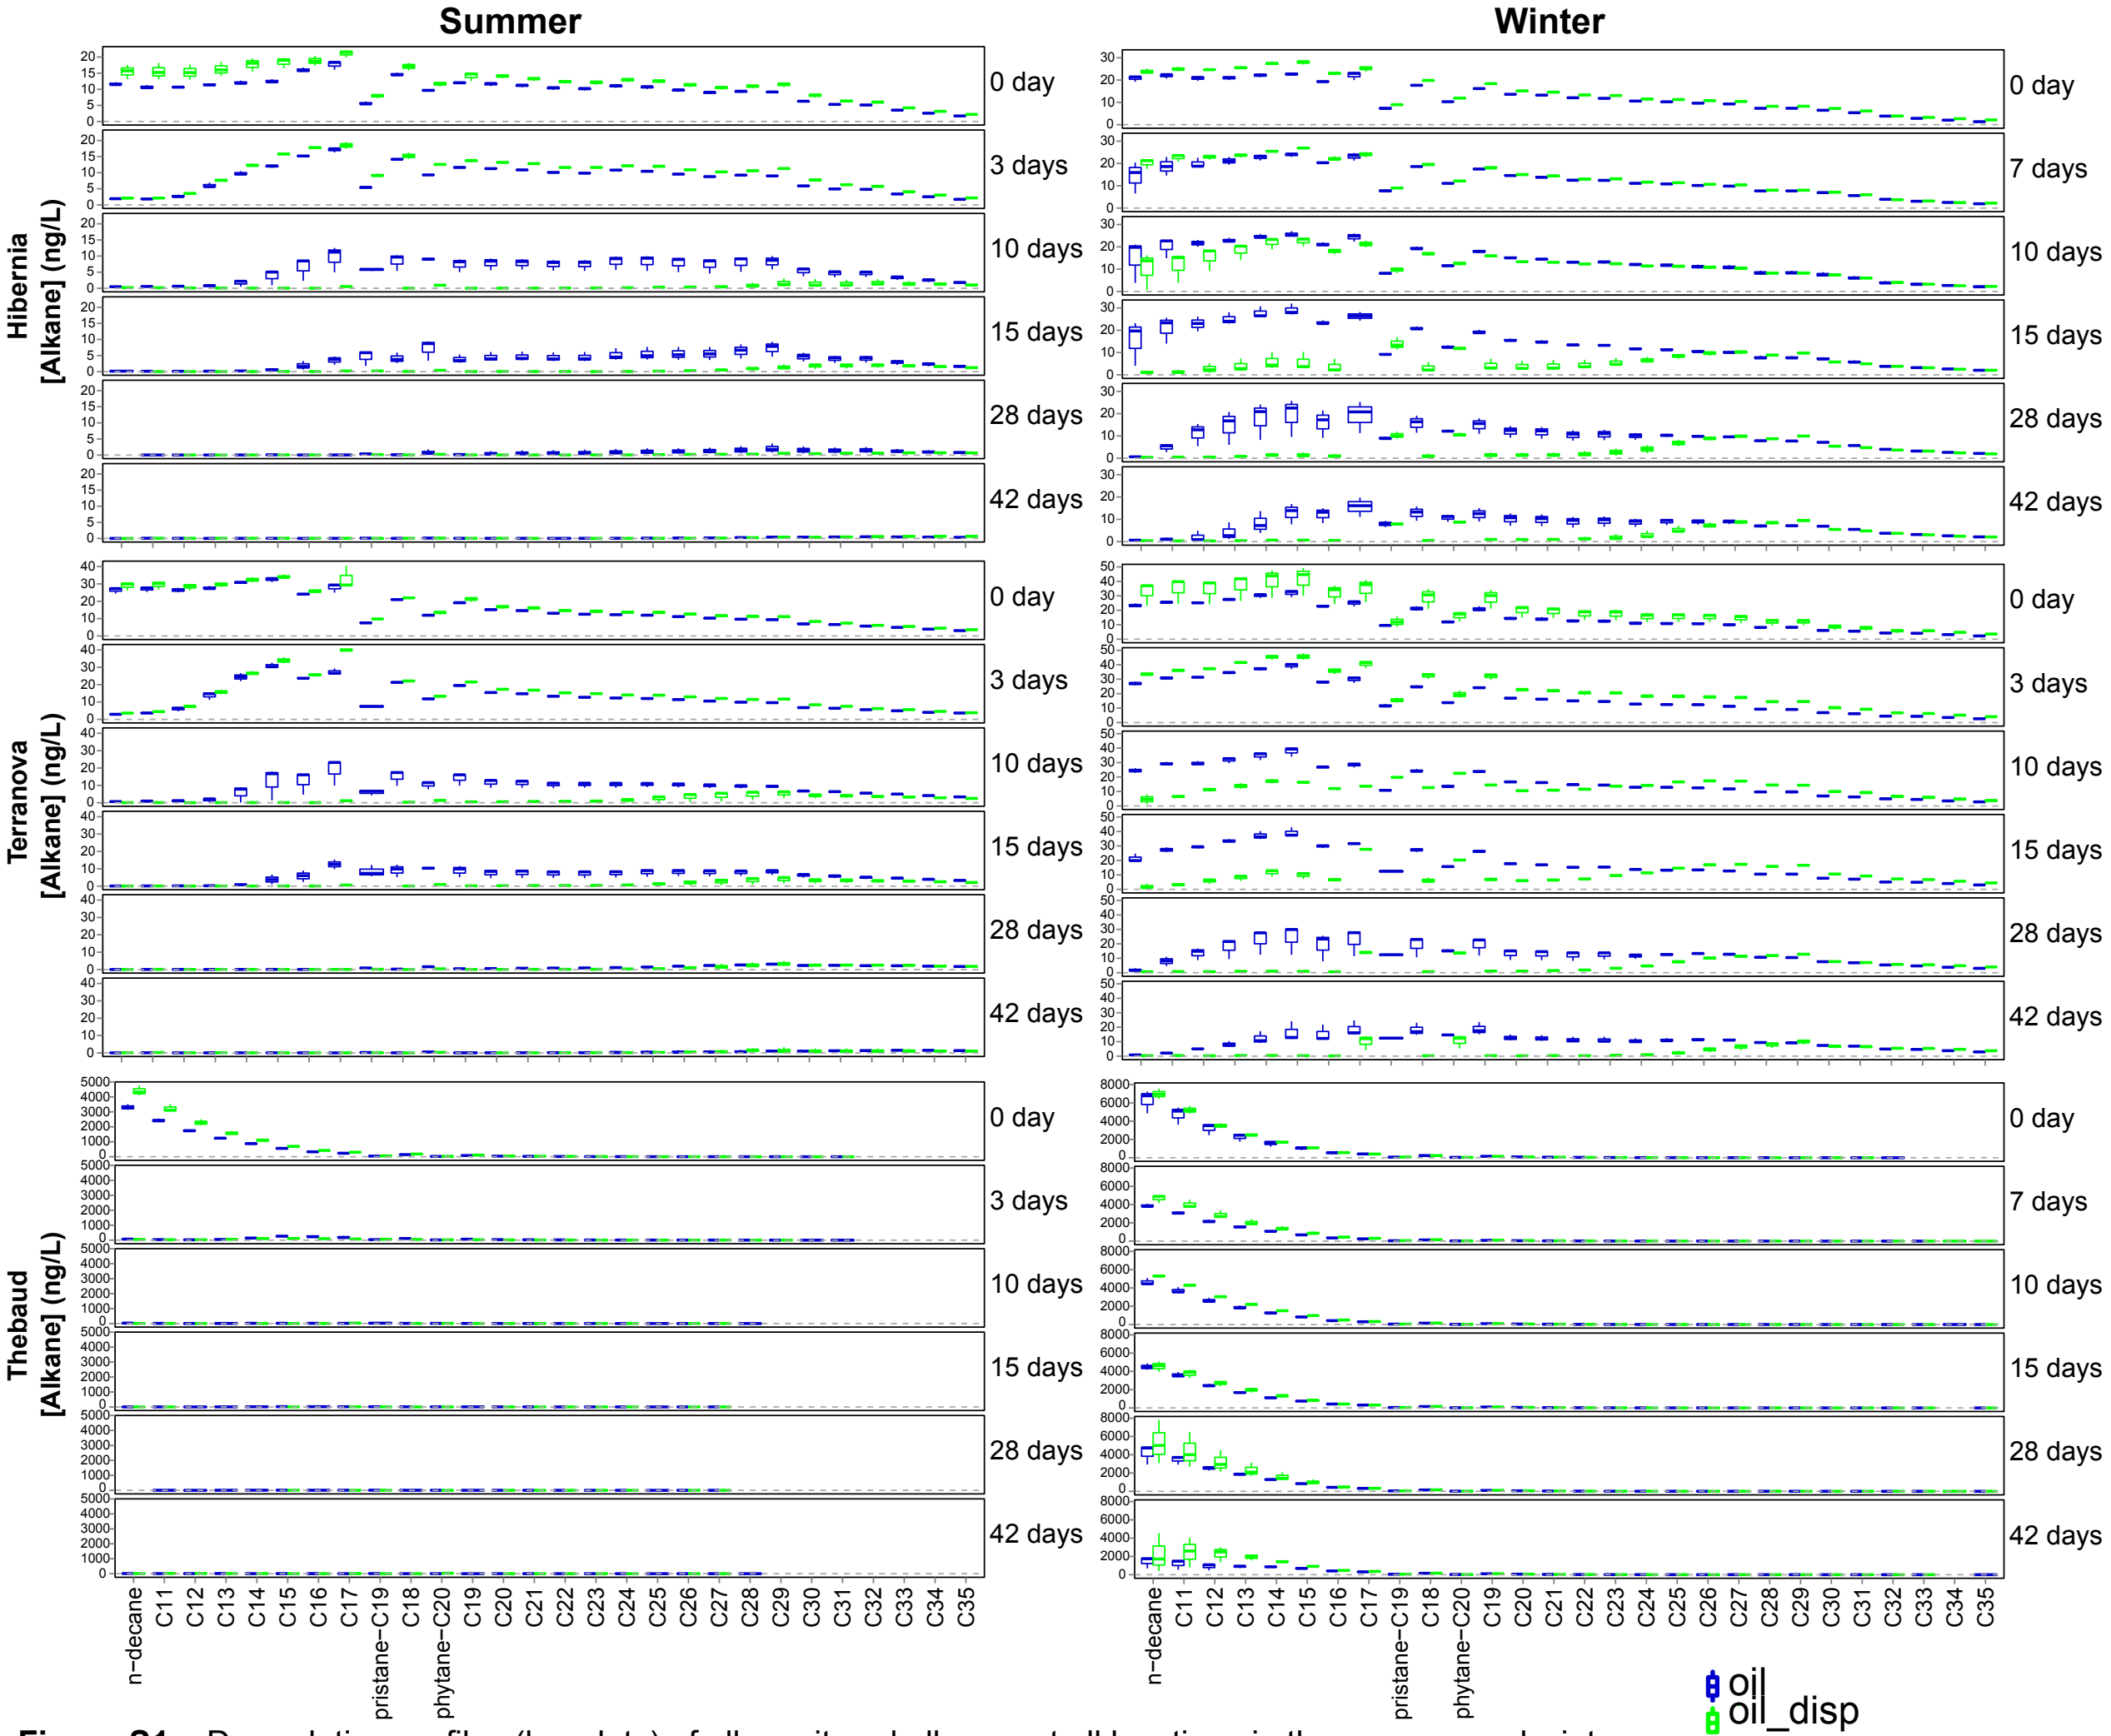

**Figure S1a.** Degradation profiles (boxplots) of all monitored alkanes at all locations in the summer and winter.

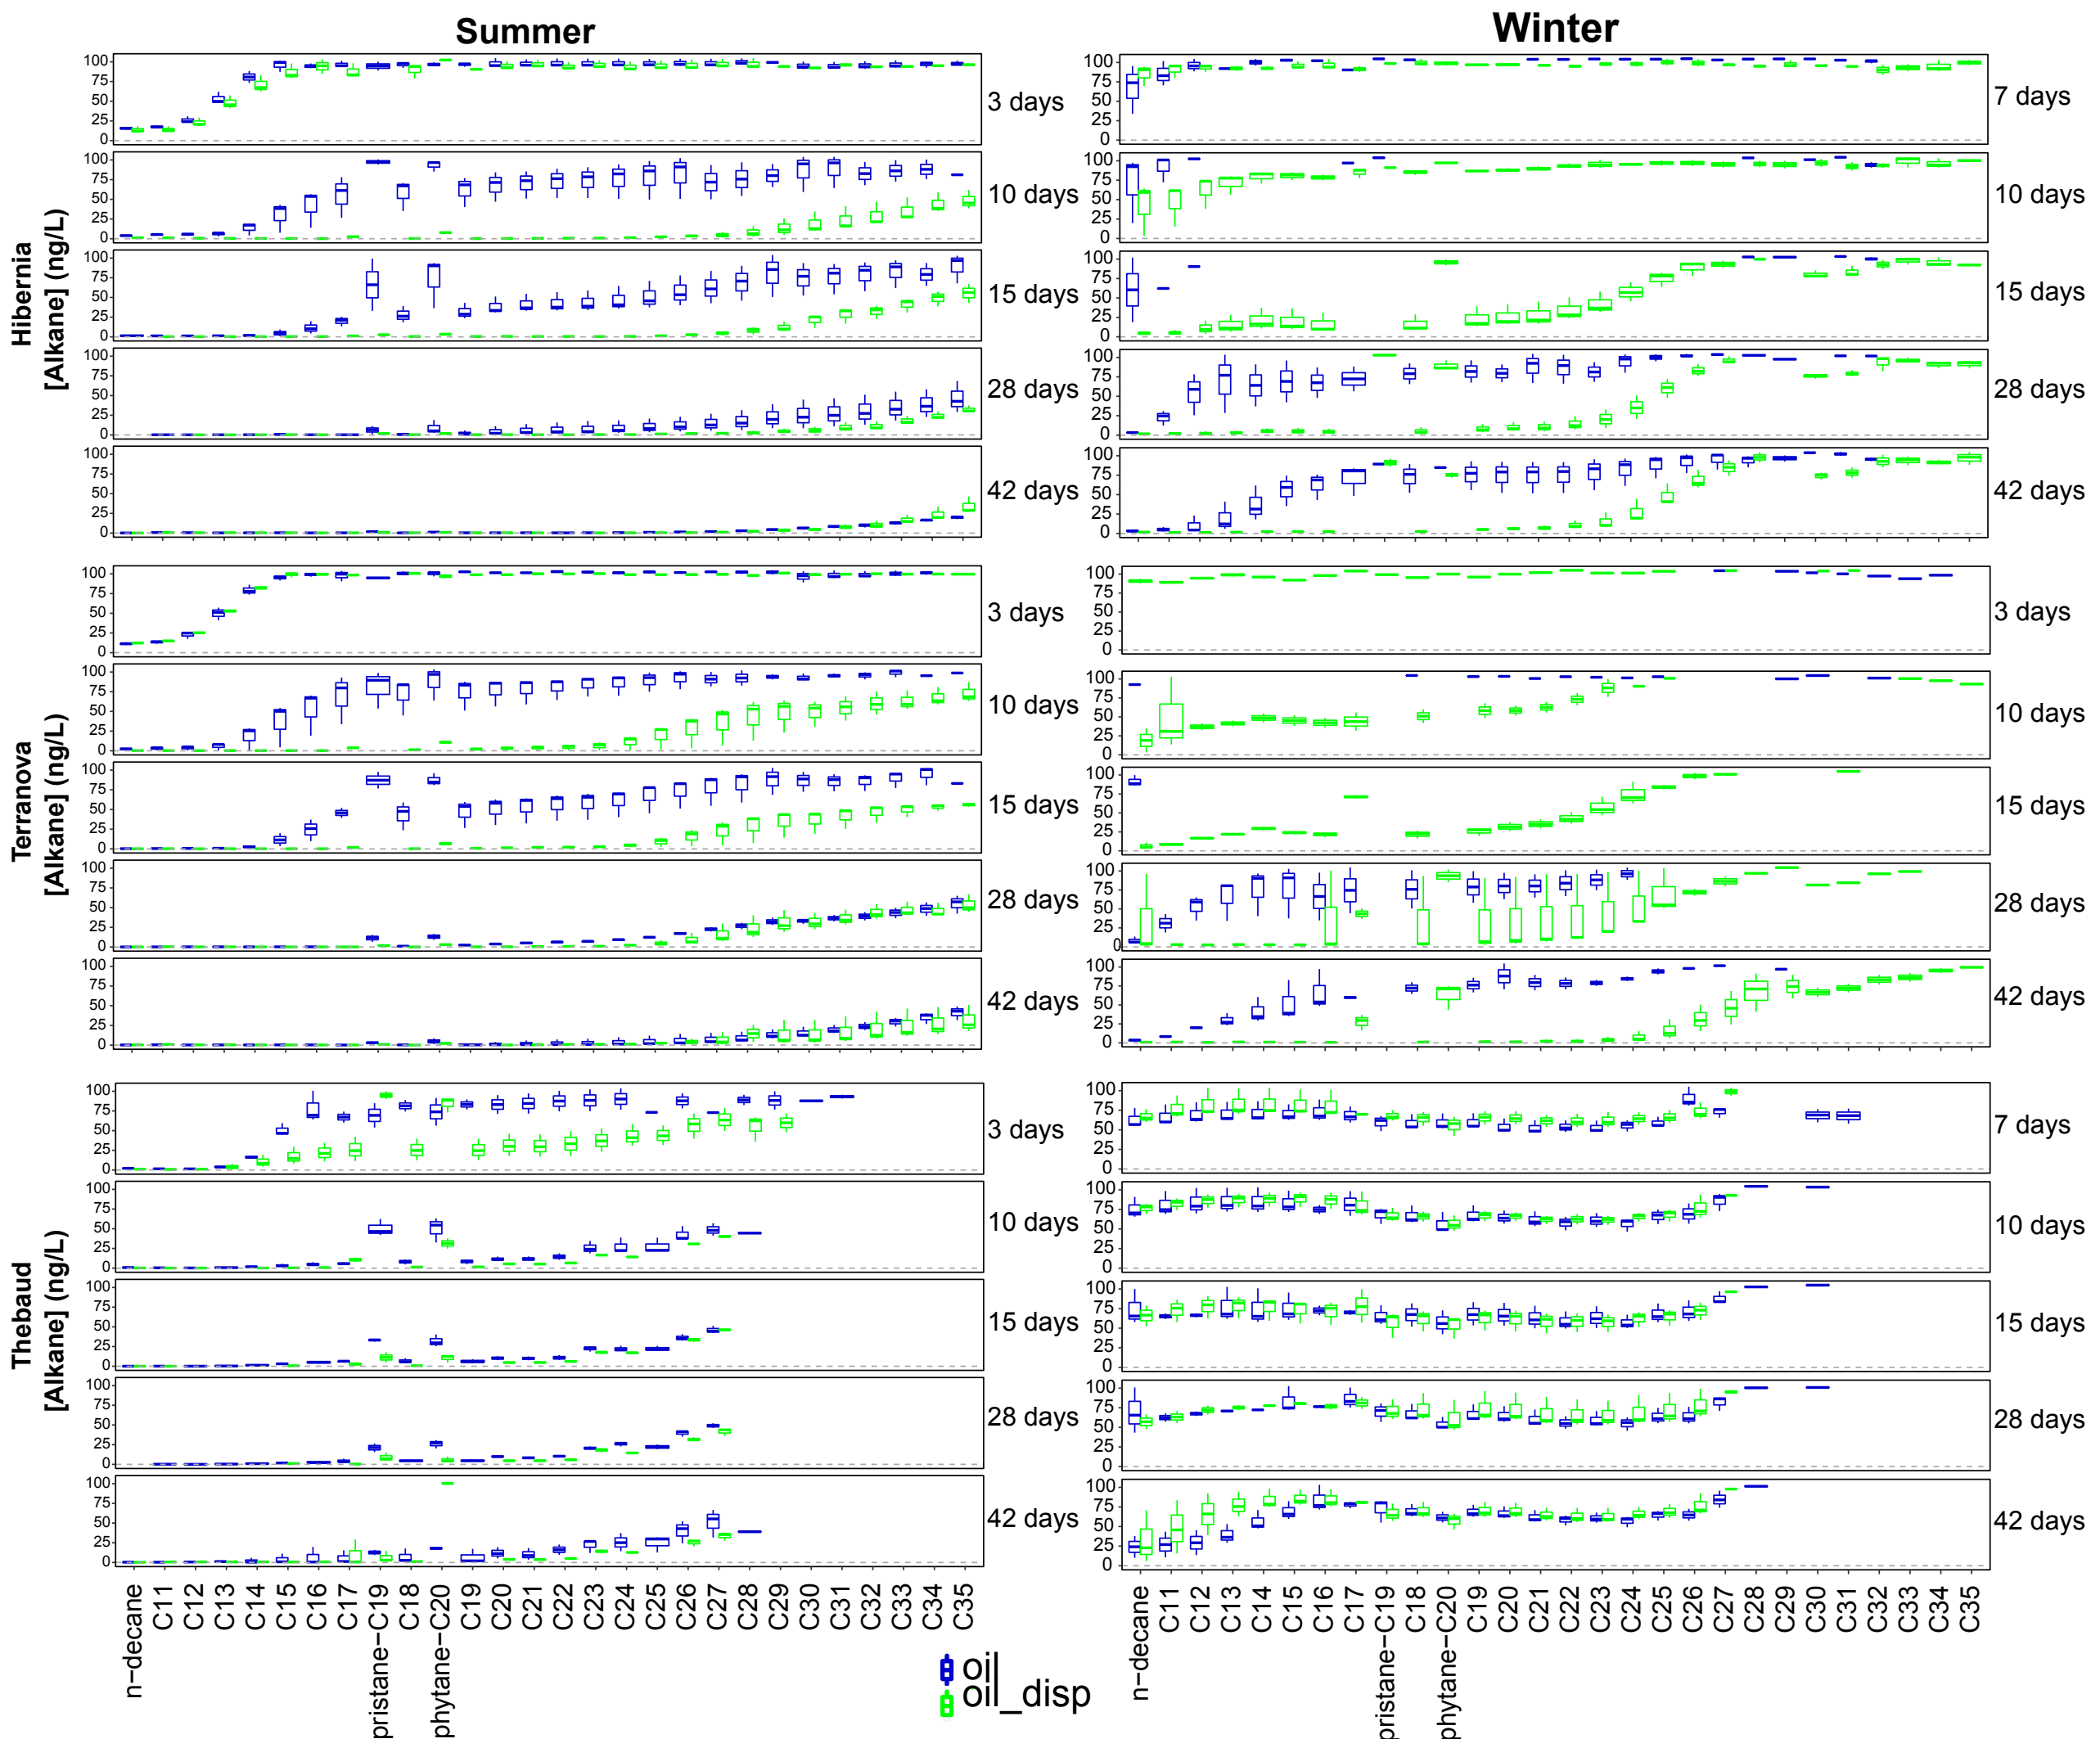

**Figure S1b.** Percentage depletion degradation profiles (boxplots) of all monitored alkanes at all locations in the summer and winter. Percentage values were obtained by dividing concentration values at 3, 7, 10, 15, 28 or 42 days by concentration values at 0 days.

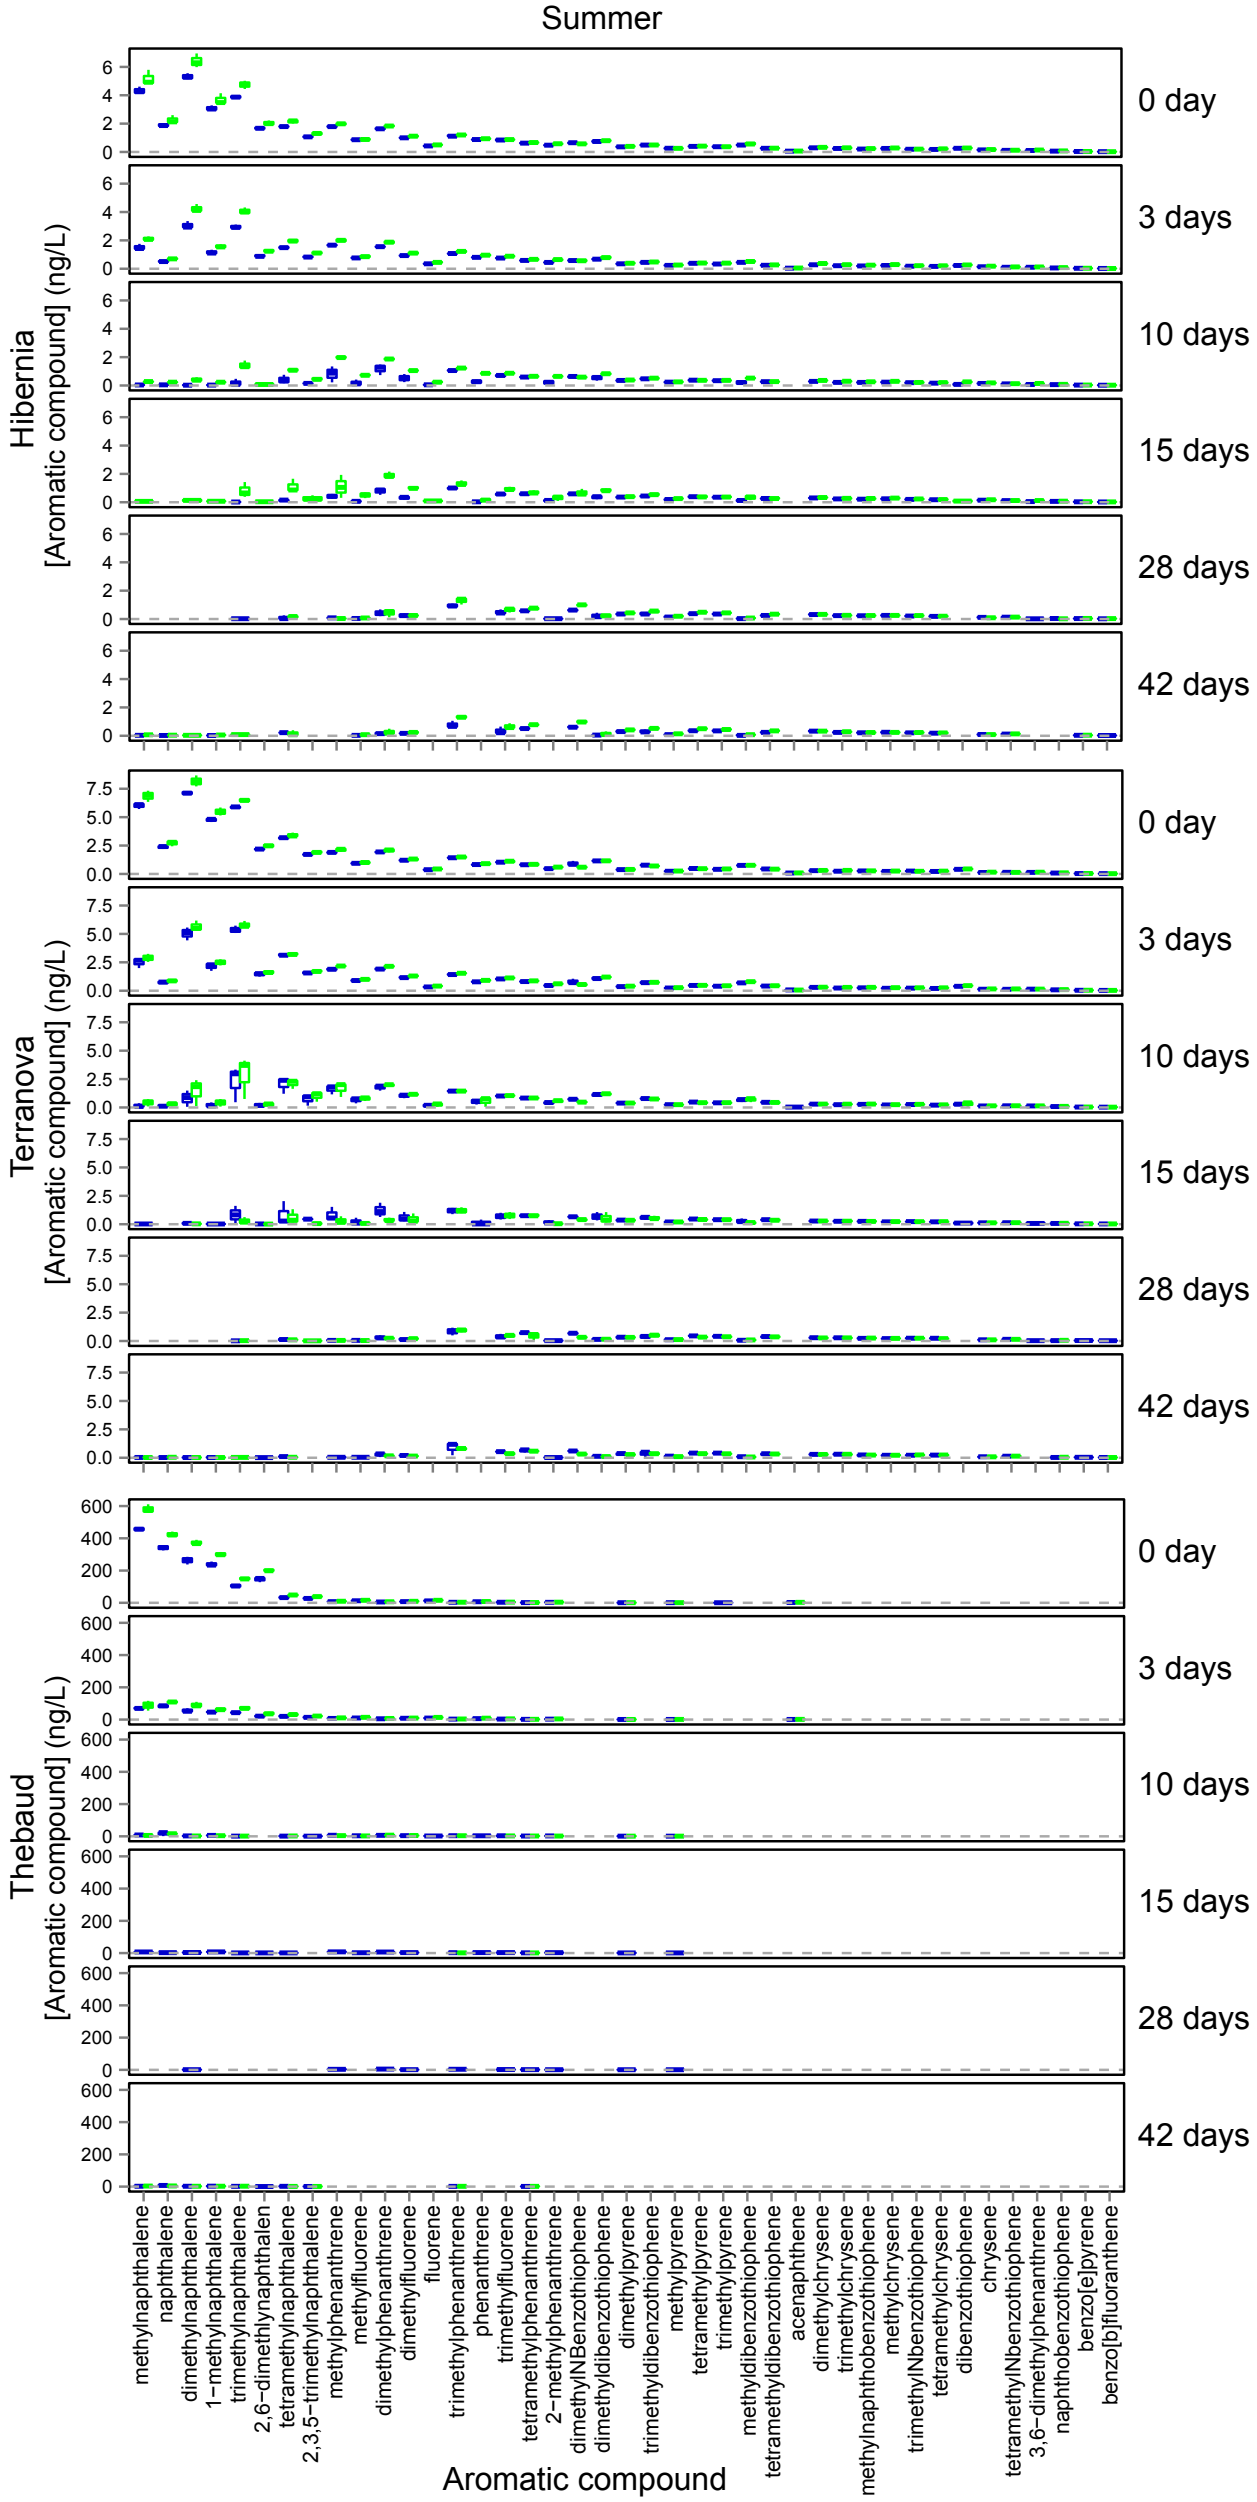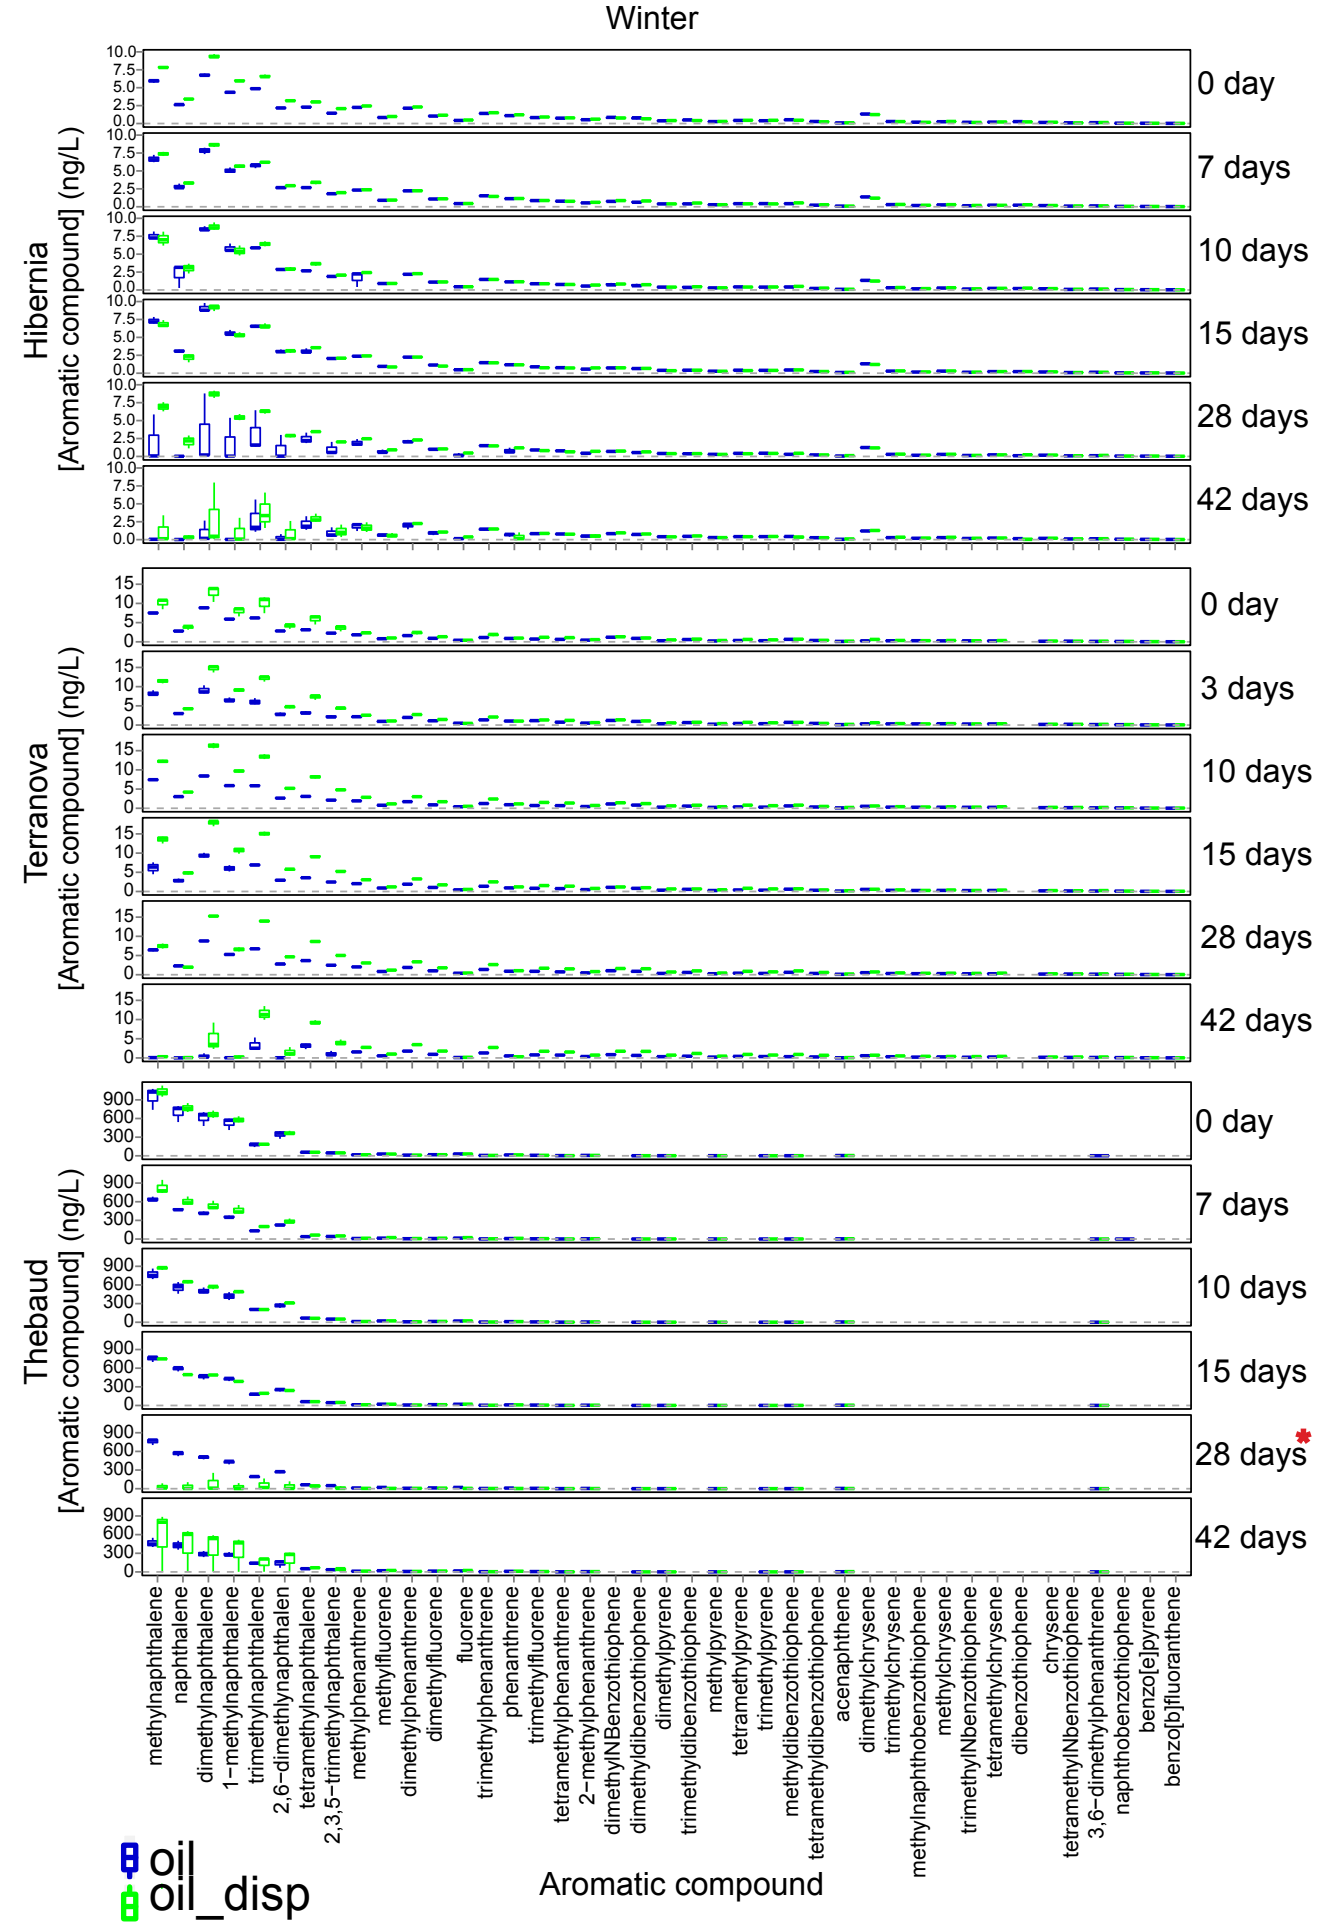

**Figure S2a.** Degradation profiles (boxplots) of all monitored aromatic compounds at all locations in the summer and winter. \*: There was a power failure to the GFI (General Fault Interrupter) plug on the dock that powered the shakers (due to inclement weather so the flasks were not shaking for approximately 72 hours).



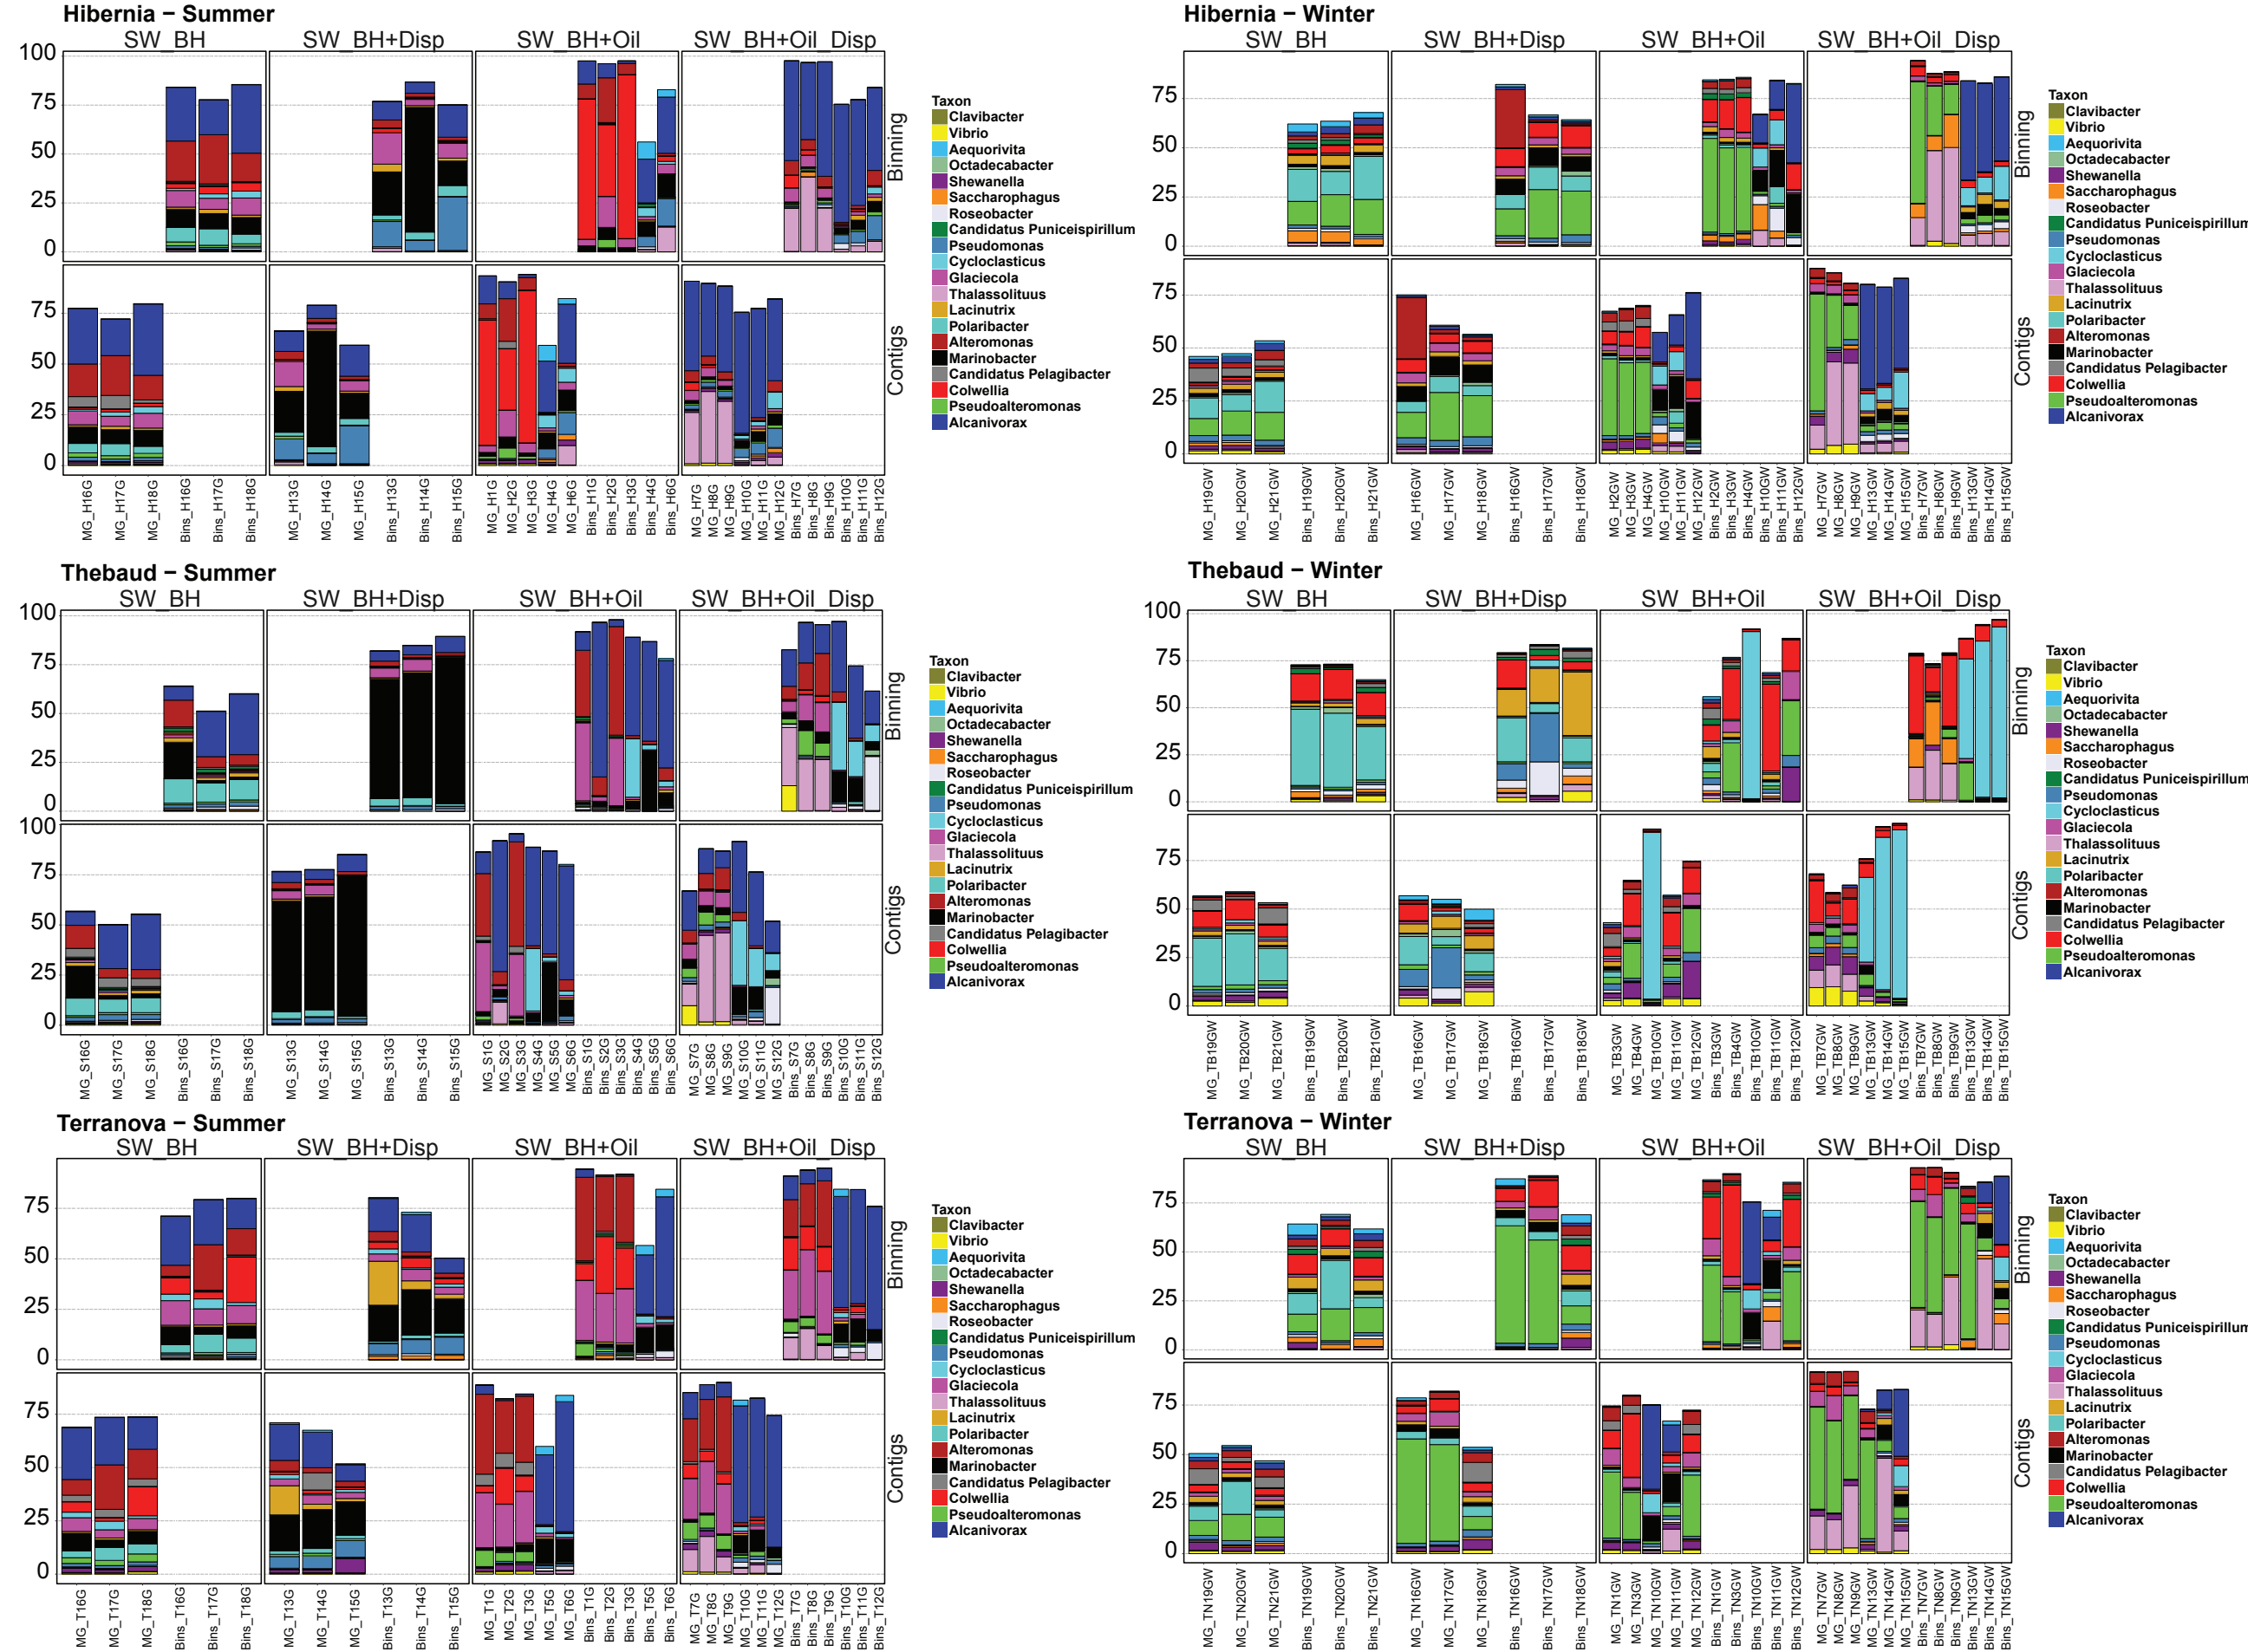

**Figure S3.** Genus level taxonomy comparison between contigs-centric and bins-based approaches. Contigs-based population profiles were obtained by summarizing taxonomic lineages assigned to each contigs. Metagenome bins population profiles were obtained by summarizing consensus taxonomic lineages as described above (See *Additional file 3 - Metagenome bins validation* for methodology).

## Alpha diversity (Observed bins)

## Alpha diversity (Shannon)

Hibernia

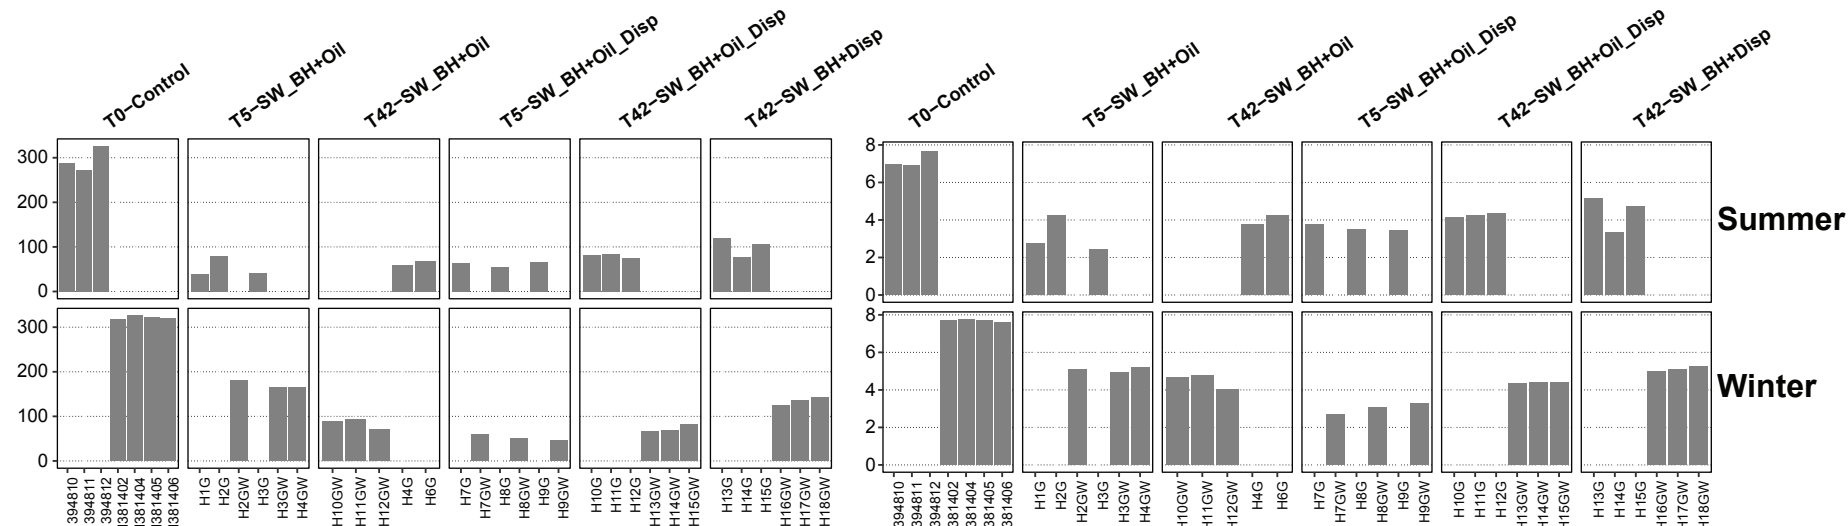

Thebaud

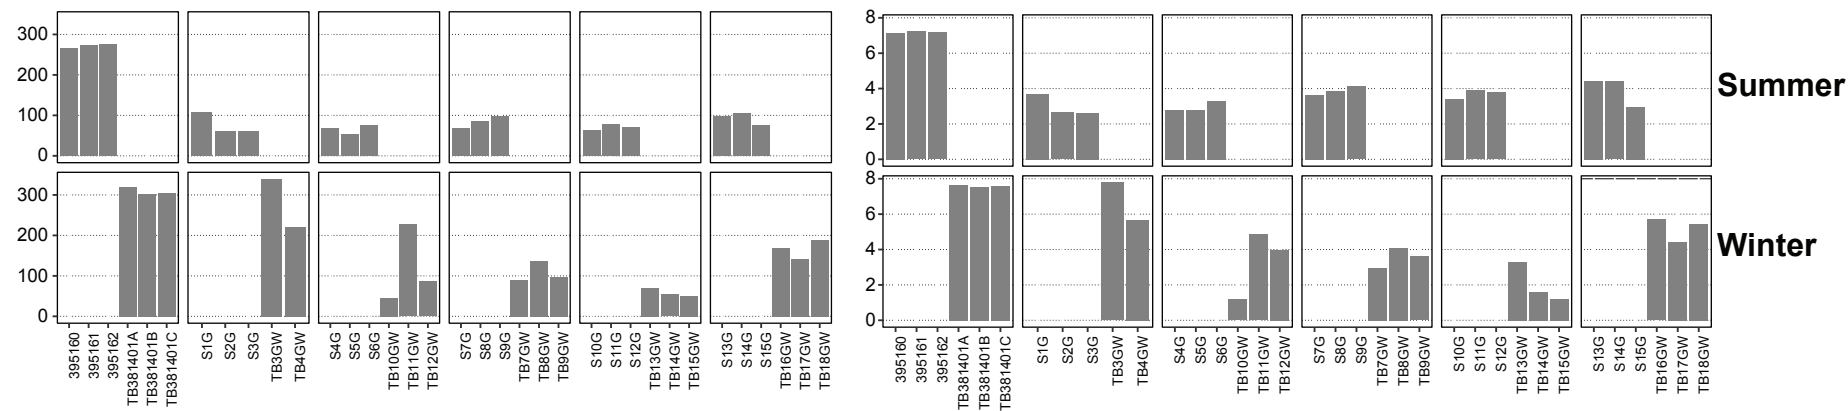

Terranova

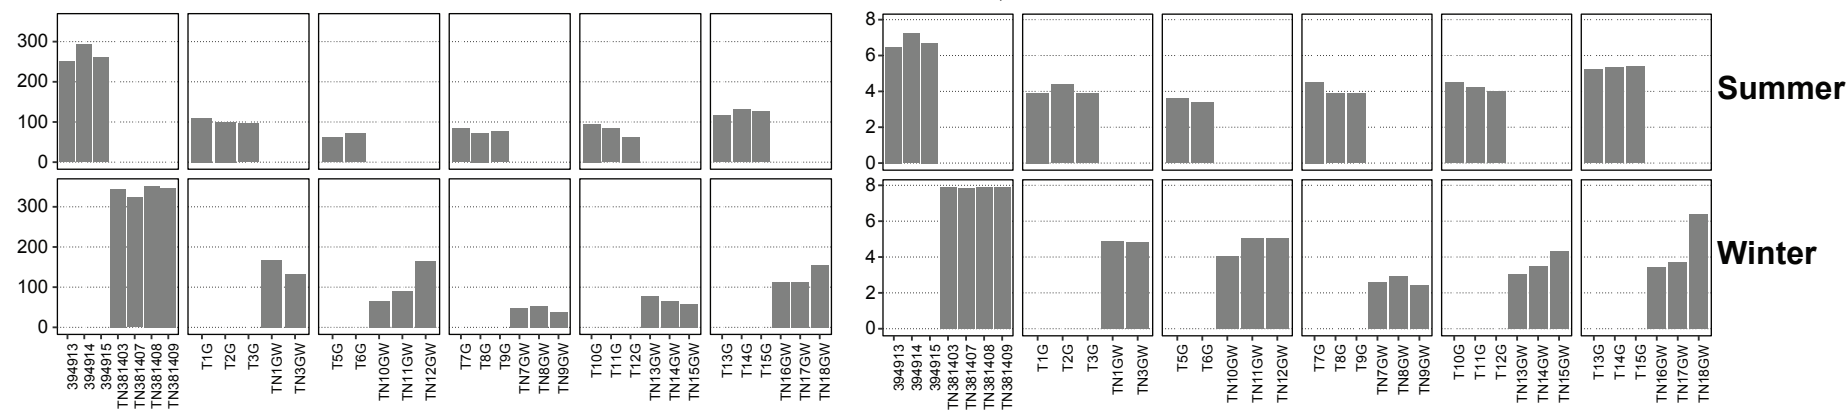

**Figure S4.** Alpha diversity metrics (Observed species/bins and Shannon indexes) computed from all 601 metagenome bins. Each bar represent a sample. Statistical significance was assessed with an ANOVA followed by a post-hoc Tukey test: For each station and season, all comparisons between T0 and other conditions were significant with an adjusted  $p$ -value lower than at least 0.05. Y-axis corresponds to sample names. Diversity indices were computed using the bins abundance table (Supplemental Information 2 datasets - Table S3).

PCoA (Bray-Curtis) of bins for Hibernia

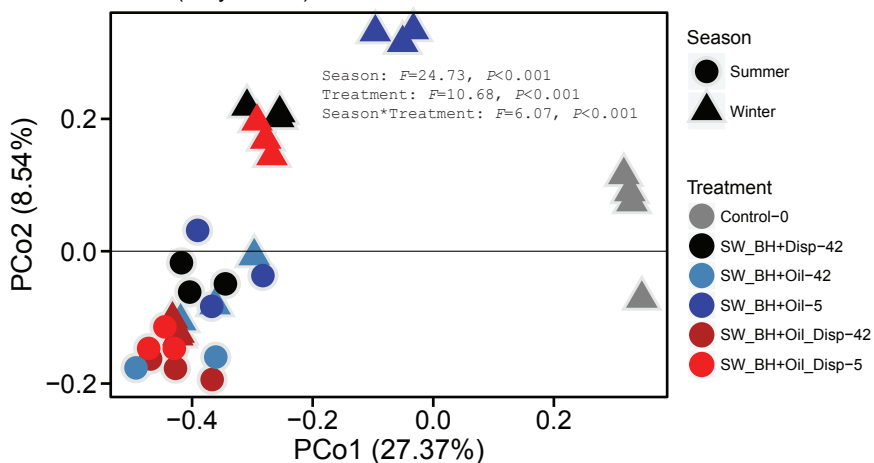

PCoA (Bray-Curtis) of bins for Thebaud

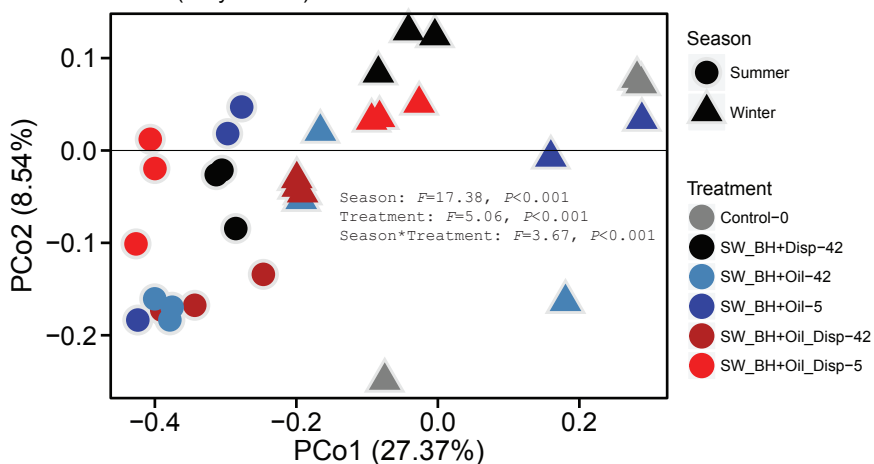

PCoA (Bray-Curtis) of bins for Terranova

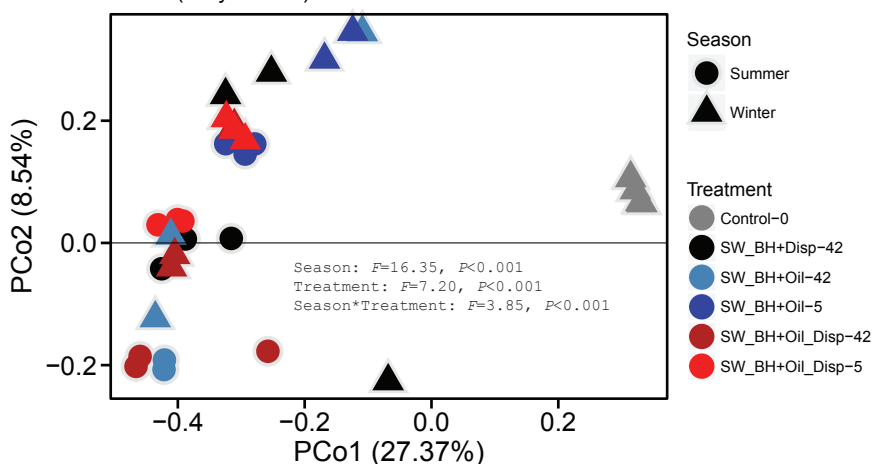

**Figure S5.** Beta diversity (Bray-Curtis) metrics computed from all 601 metagenome bins (*Supplemental Information 2 datasets - Table S3*). Each point represents a sample. Permanova was performed using the “adonis” function of the vegan library.

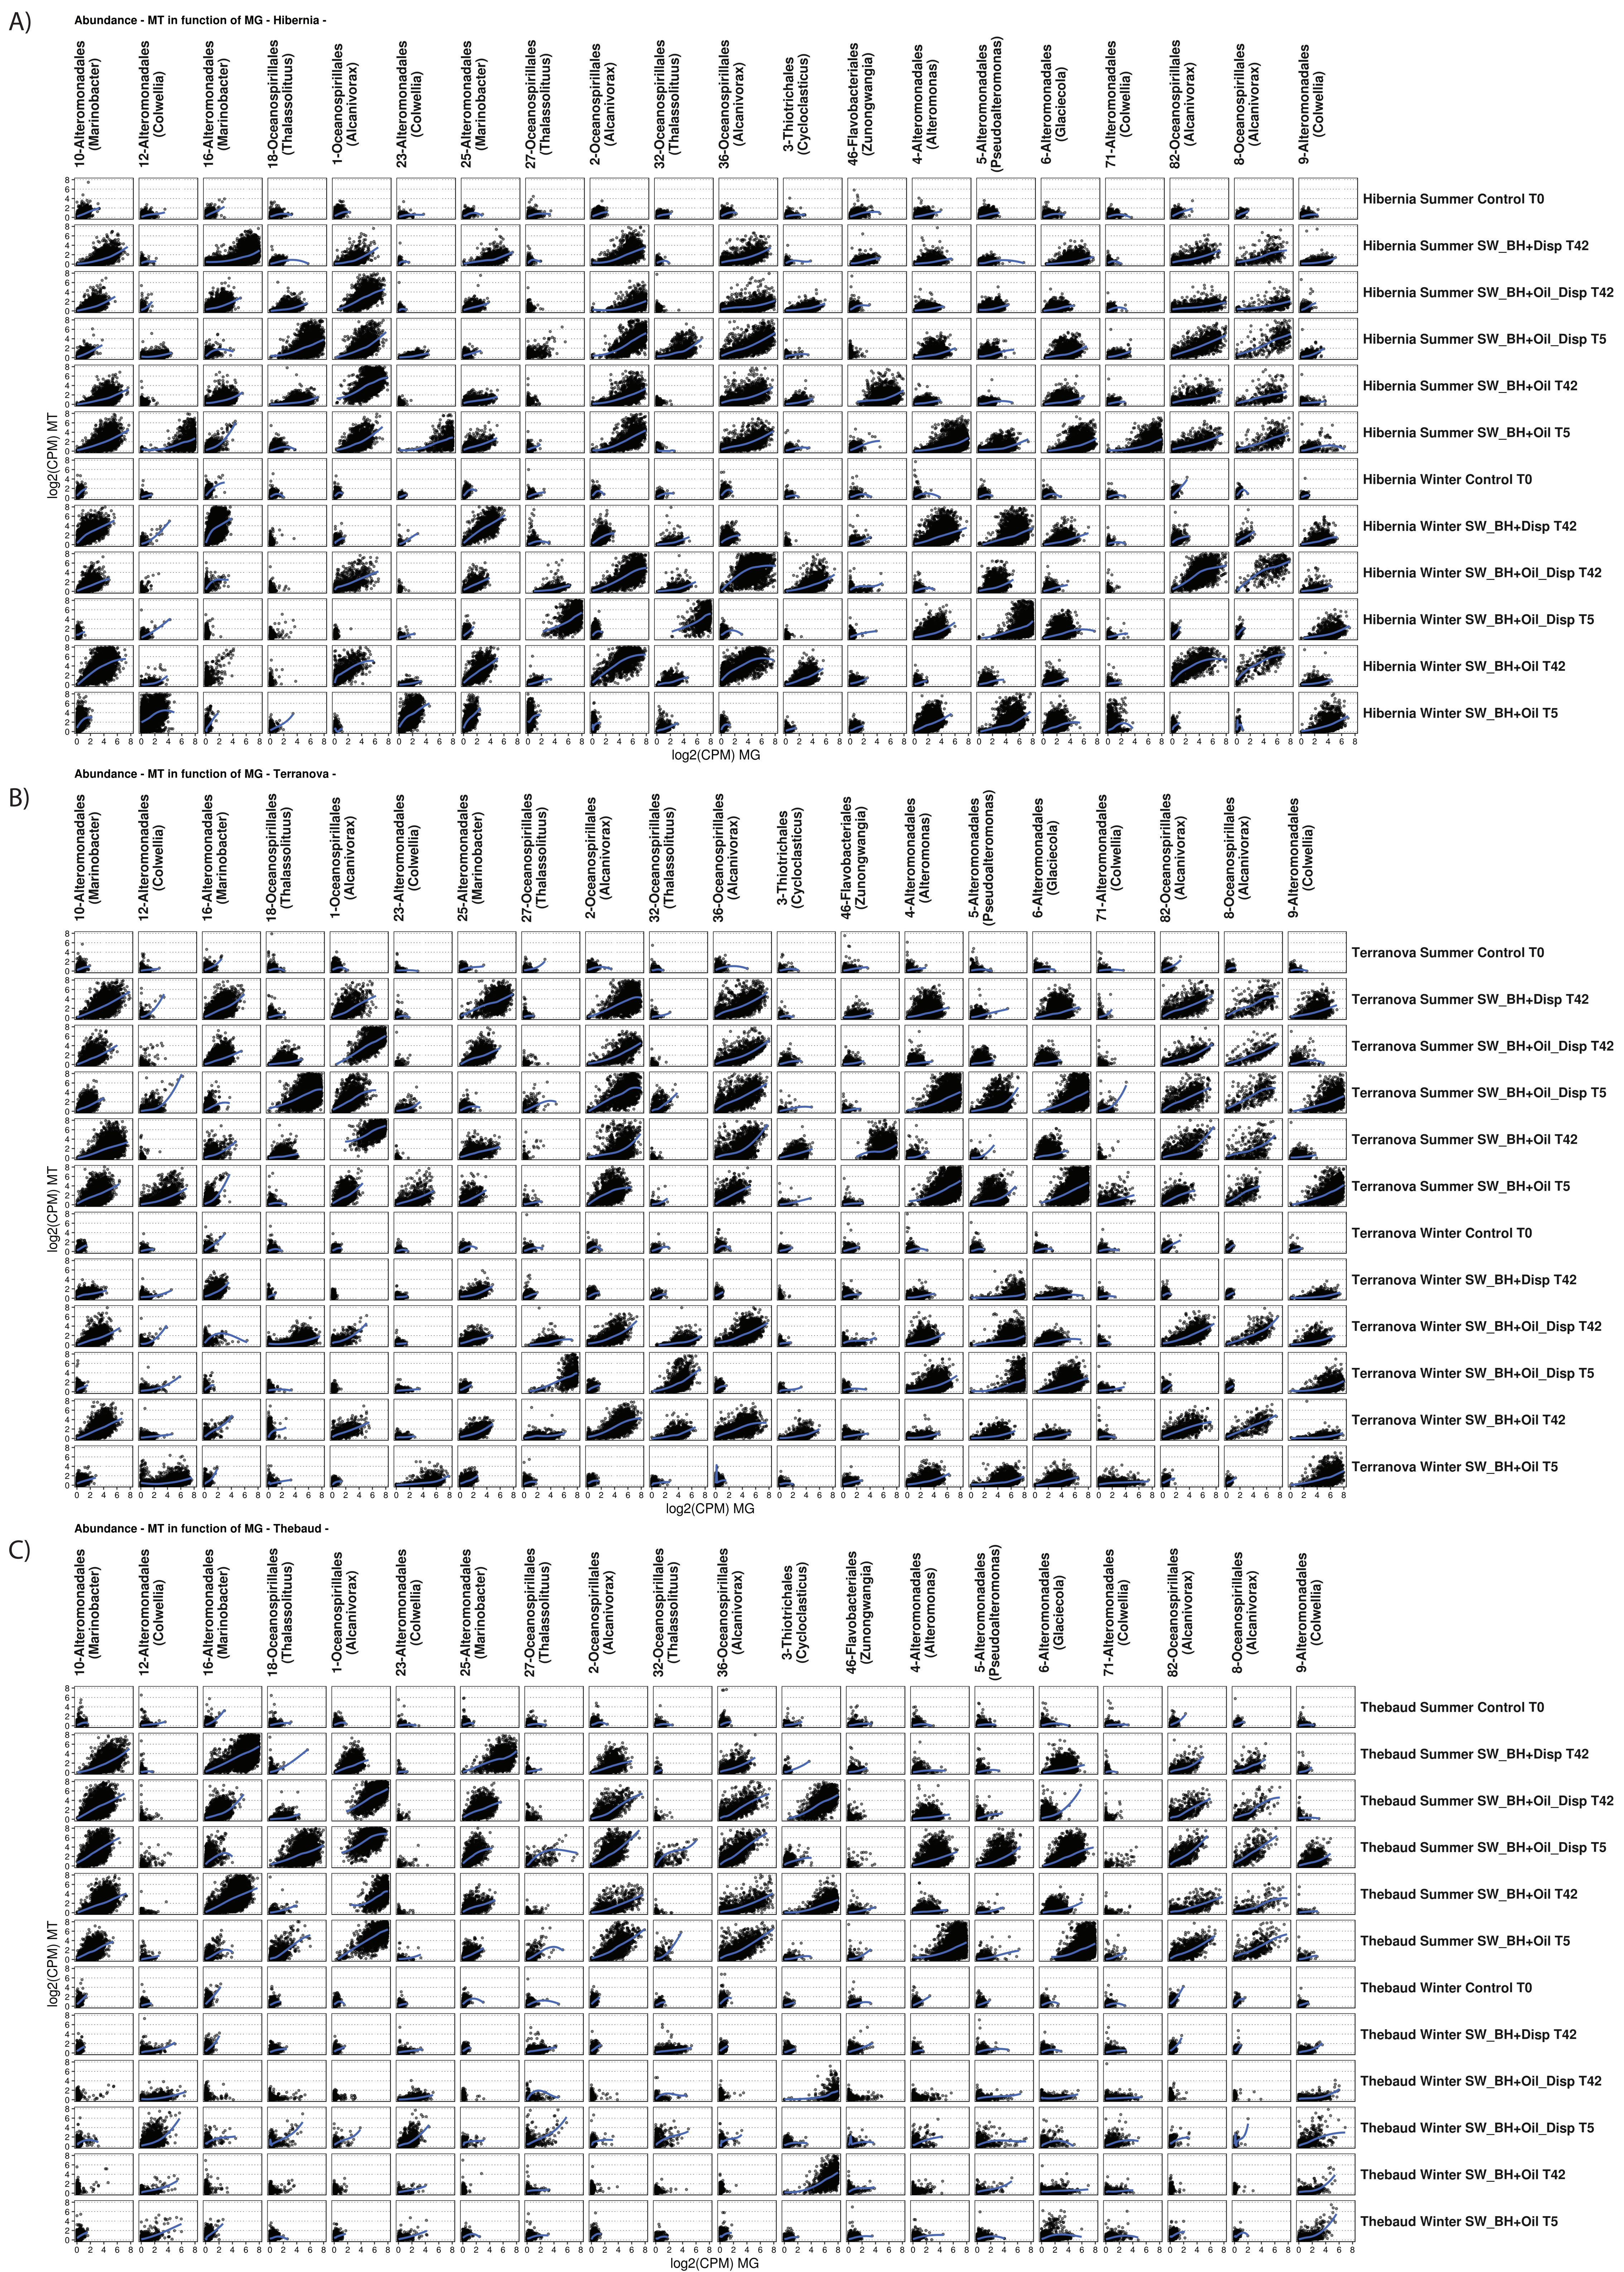

Supplement: ismej2017129x1.pdf [file ismej2017129x1.pdf]
